# Supplementary material for: Mn2+/Mn4+co-doped LaM1−xAl11−yO19(M = Mg, Zn) luminescent materials: electronic structure, energy transfer and optical thermometric properties
Source: Royal Society of Chemistry journal article supplement (doi:10.1039/d1dt00153a), 2021-01-01
Supplement: d1dt00153a1.pdf [file d1dt00153a1.pdf]

**Mn<sup>2+</sup>/Mn<sup>4+</sup> co-doped LaM<sub>1-x</sub>Al<sub>11-y</sub>O<sub>19</sub> (M = Mg, Zn)  
luminescent materials: electronic structure, energy  
transfer and optical thermometry properties**

Dayu Huang,<sup>a,b</sup> Qiuyun Ouyang<sup>a,\*</sup> Bin Liu,<sup>a,b</sup> Bingkun Chen,<sup>a</sup> Yuting

Wang,<sup>a</sup> Chenggang Yuan,<sup>a</sup> Hui Xiao,<sup>b</sup> Hongzhou Lian,<sup>b,\*</sup> and Jun Lin<sup>b,\*</sup>

<sup>a</sup> *Key Laboratory of In-Fiber Integrated Optics, Ministry Education of China, and  
College of Physics and Optoelectronic Engineering, Harbin Engineering University,  
Harbin 150001, China*

<sup>b</sup> *State Key Laboratory of Rare Earth Resource Utilization, Changchun Institute of  
Applied Chemistry, Chinese Academy of Sciences, Changchun 130022, P. R. China*

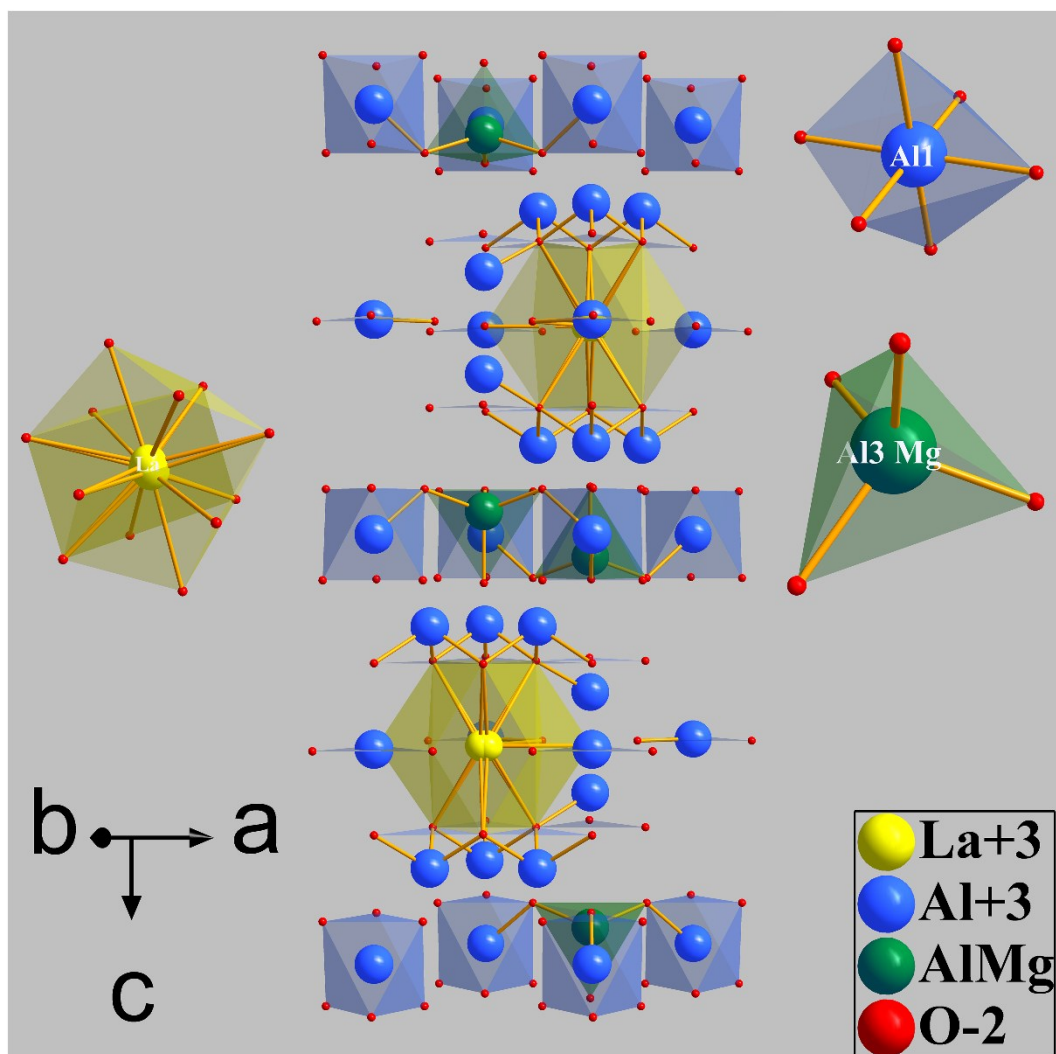

Figure S1. Unit cell of  $\text{LaZnAl}_{11}\text{O}_{19}$  and the illustrated polyhedrons.

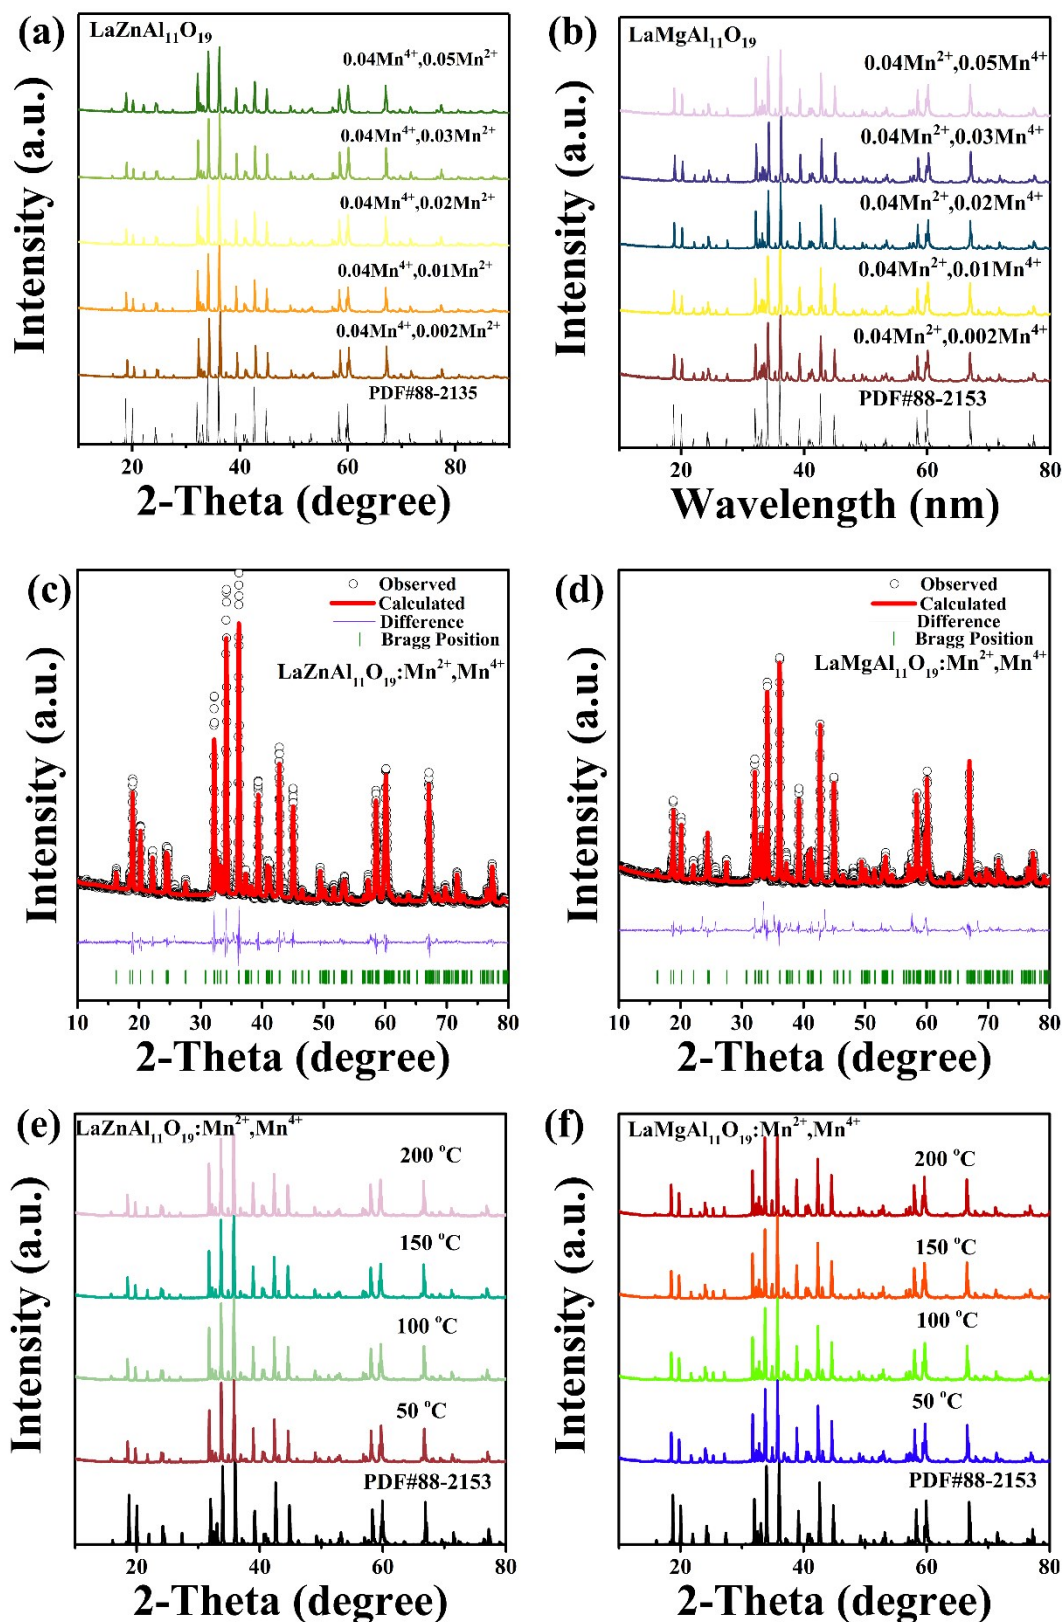

**Figure S2.** (a-b) Powder XRD patterns of  $\text{LaM}_{1-x}\text{Al}_{11-y}\text{O}_{19}:x\text{Mn}^{2+},y\text{Mn}^{4+}$  ( $M = \text{Mg}, \text{Zn}$ ). Rietveld refinement XRD data of the representative (c)  $\text{LaZnAl}_{11}\text{O}_{19}:0.04\text{Mn}^{2+},0.03\text{Mn}^{4+}$ , (d)  $\text{LaMgAl}_{11}\text{O}_{19}:0.04\text{Mn}^{2+},0.04\text{Mn}^{4+}$ , (e-f) Powder XRD patterns of representative  $\text{LaM}_{1-x}\text{Al}_{11-y}\text{O}_{19}:0.04\text{Mn}^{2+},y\text{Mn}^{4+}$  ( $M = \text{Mg}, \text{Zn}$ ) in the range of 50–200 °C.

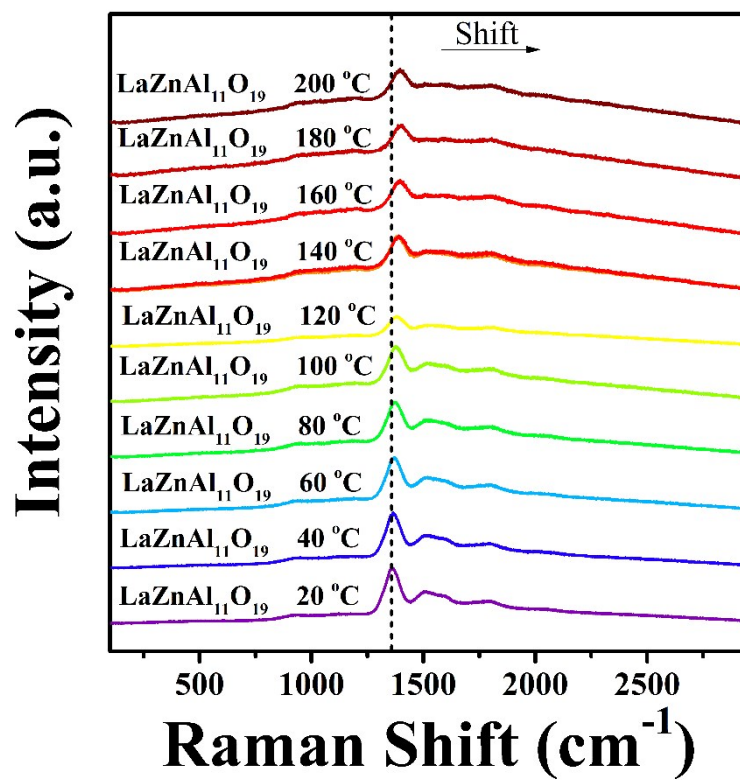

**Figure S3.** Temperature-dependent Raman spectra of LaZnAl<sub>11</sub>O<sub>19</sub> in the 20-200 °C range.

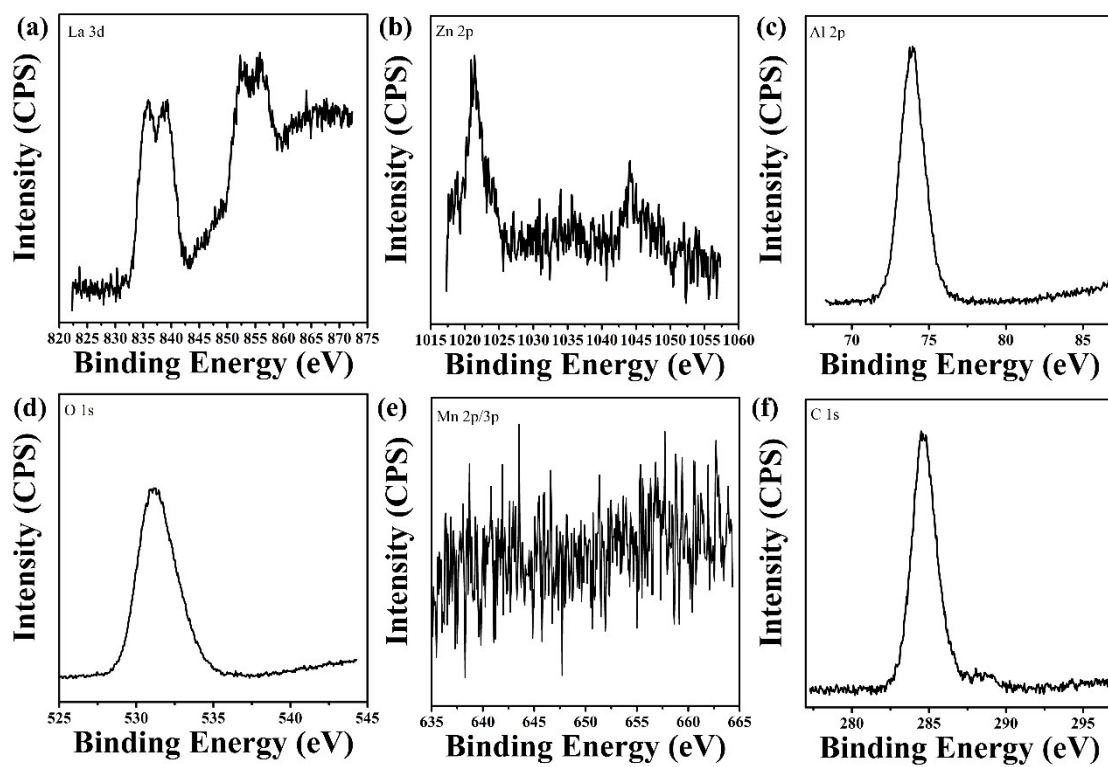

**Figure S4.** The La 3d, Zn 2p, Al 2p, O 1s, Mn 2p/3p and C 1s XPS spectra of  $\text{LaZnAl}_{11}\text{O}_{19}:\text{Mn}^{2+}, \text{Mn}^{4+}$ .

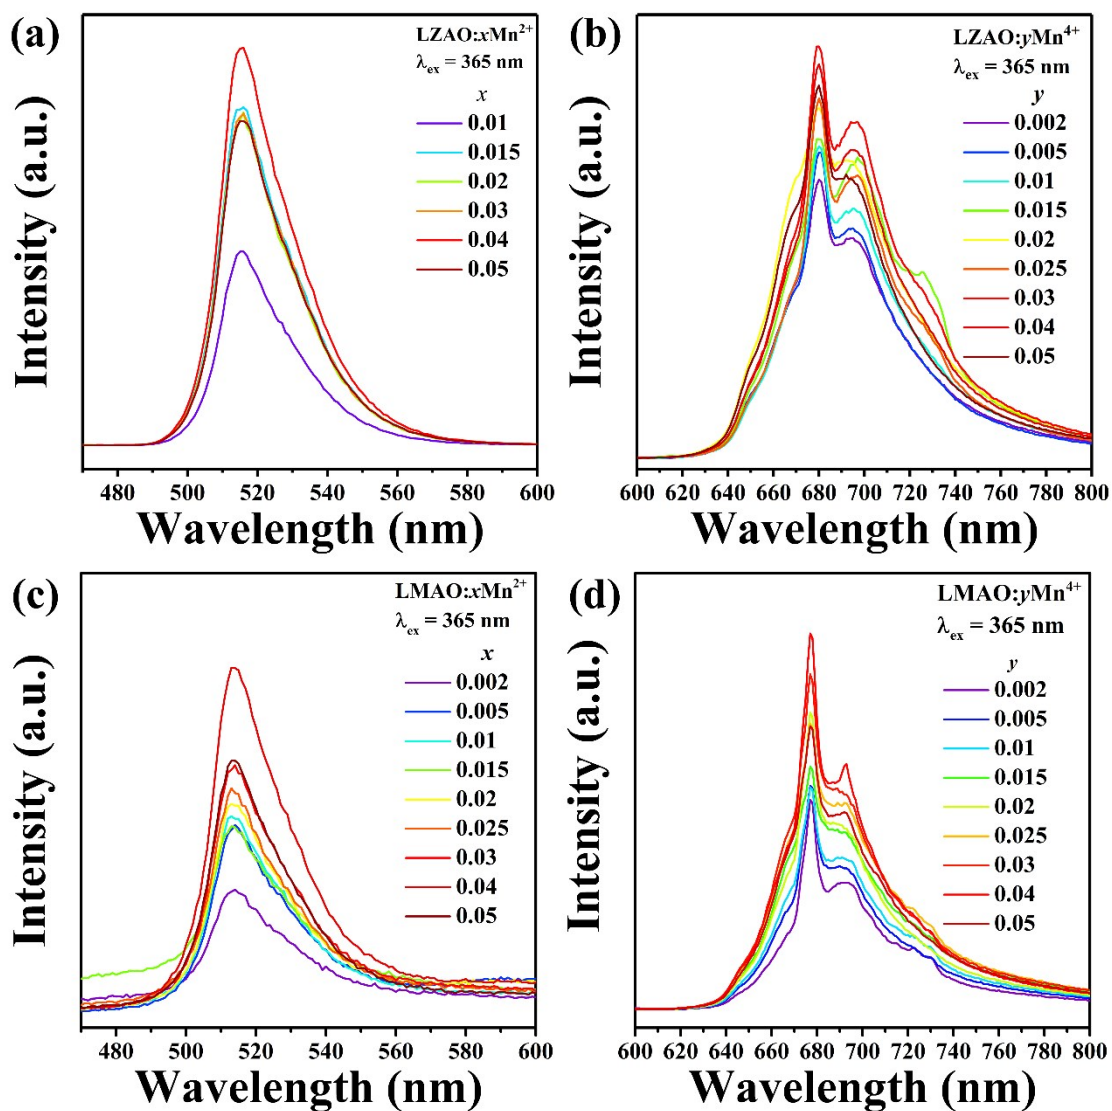

**Figure S5.** PL spectra of LaZnAl<sub>11</sub>O<sub>19</sub> phosphors single-doped with (a) Mn<sup>2+</sup> ( $\lambda_{\text{ex}} = 365$  nm), (b) Mn<sup>4+</sup> ( $\lambda_{\text{ex}} = 365$  nm). PL spectra of LaMgAl<sub>11</sub>O<sub>19</sub> phosphors single-doped with (c) Mn<sup>2+</sup> ( $\lambda_{\text{ex}} = 365$  nm), (d) Mn<sup>4+</sup> ( $\lambda_{\text{ex}} = 365$  nm).

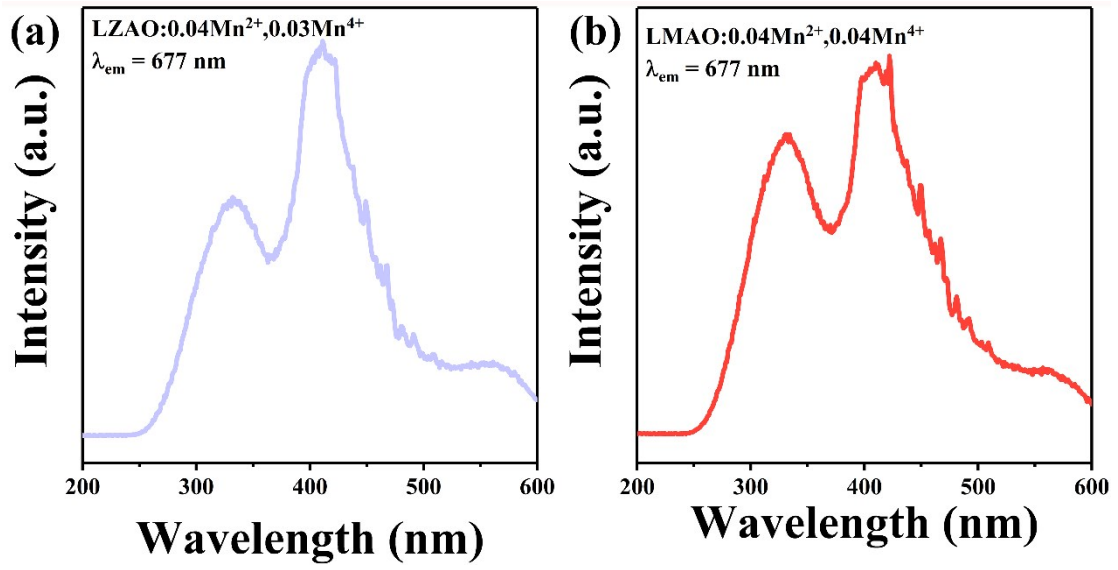

**Figure S6.** PLE of (a) LZA:0.04Mn<sup>2+</sup>,0.03Mn<sup>4+</sup> and (b) LMAO:0.04Mn<sup>2+</sup>,0.04Mn<sup>4+</sup>sample ( $\lambda_{em} = 677 \text{ nm}$ ).

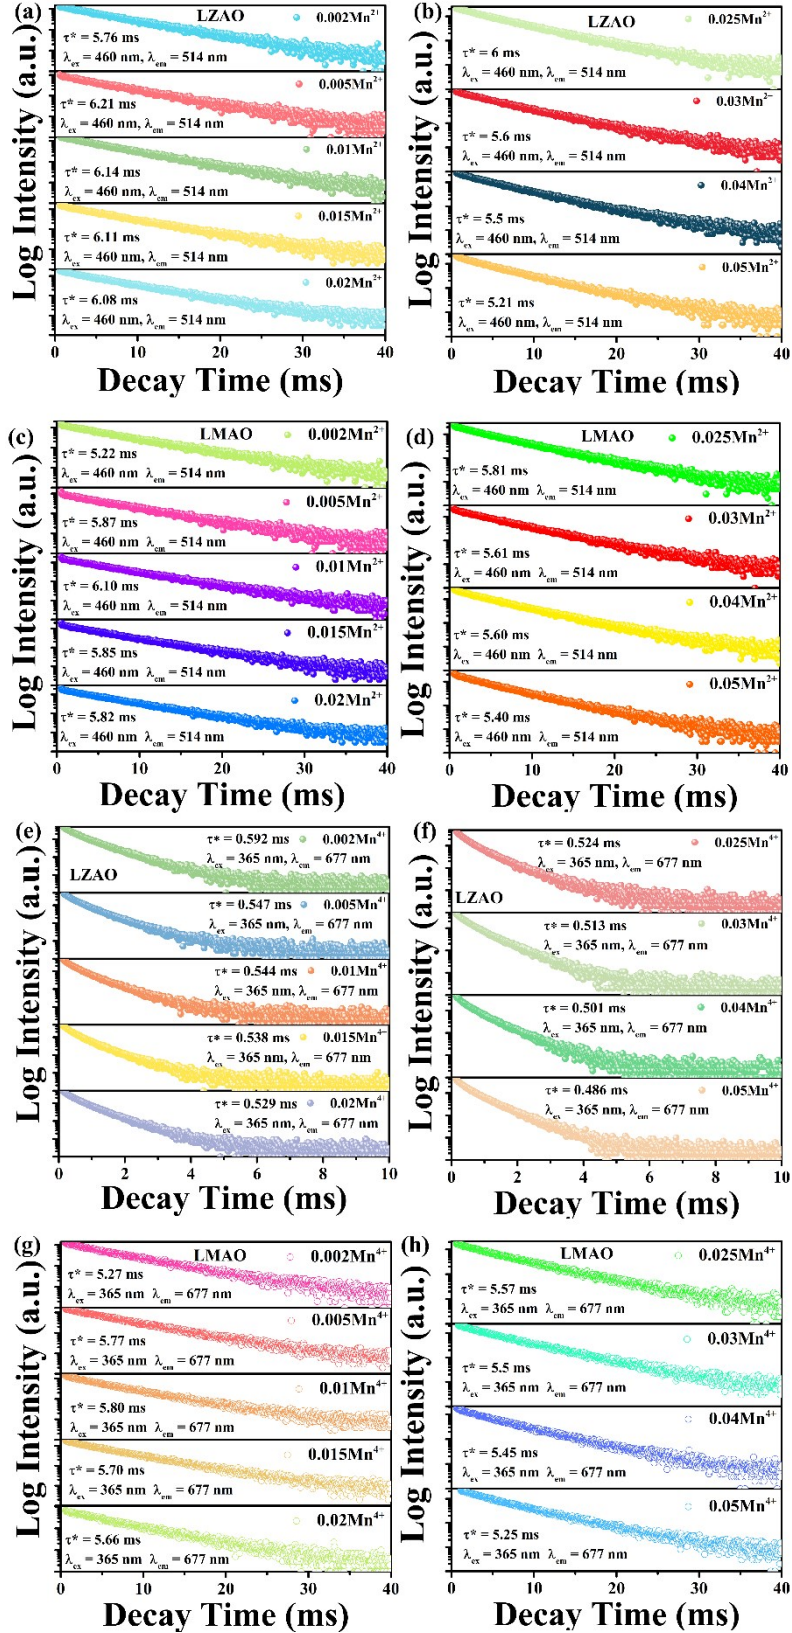

**Figure S7.** Decay curves of  $\text{Mn}^{2+}$  in (a-b)  $\text{LaZnAl}_{11}\text{O}_{19}:x\text{Mn}^{2+}$  and (c-d)  $\text{LaMgAl}_{11}\text{O}_{19}:x\text{Mn}^{2+}$  ( $\lambda_{\text{ex}} = 460 \text{ nm}$ ,  $\lambda_{\text{em}} = 514 \text{ nm}$ ). PL decay curves of  $\text{Mn}^{4+}$  in (e-f)  $\text{LaZnAl}_{11}\text{O}_{19}:y\text{Mn}^{4+}$  and (g-h)  $\text{LaMgAl}_{11}\text{O}_{19}:y\text{Mn}^{4+}$  ( $\lambda_{\text{ex}} = 365 \text{ nm}$ ,  $\lambda_{\text{em}} = 677 \text{ nm}$ ).



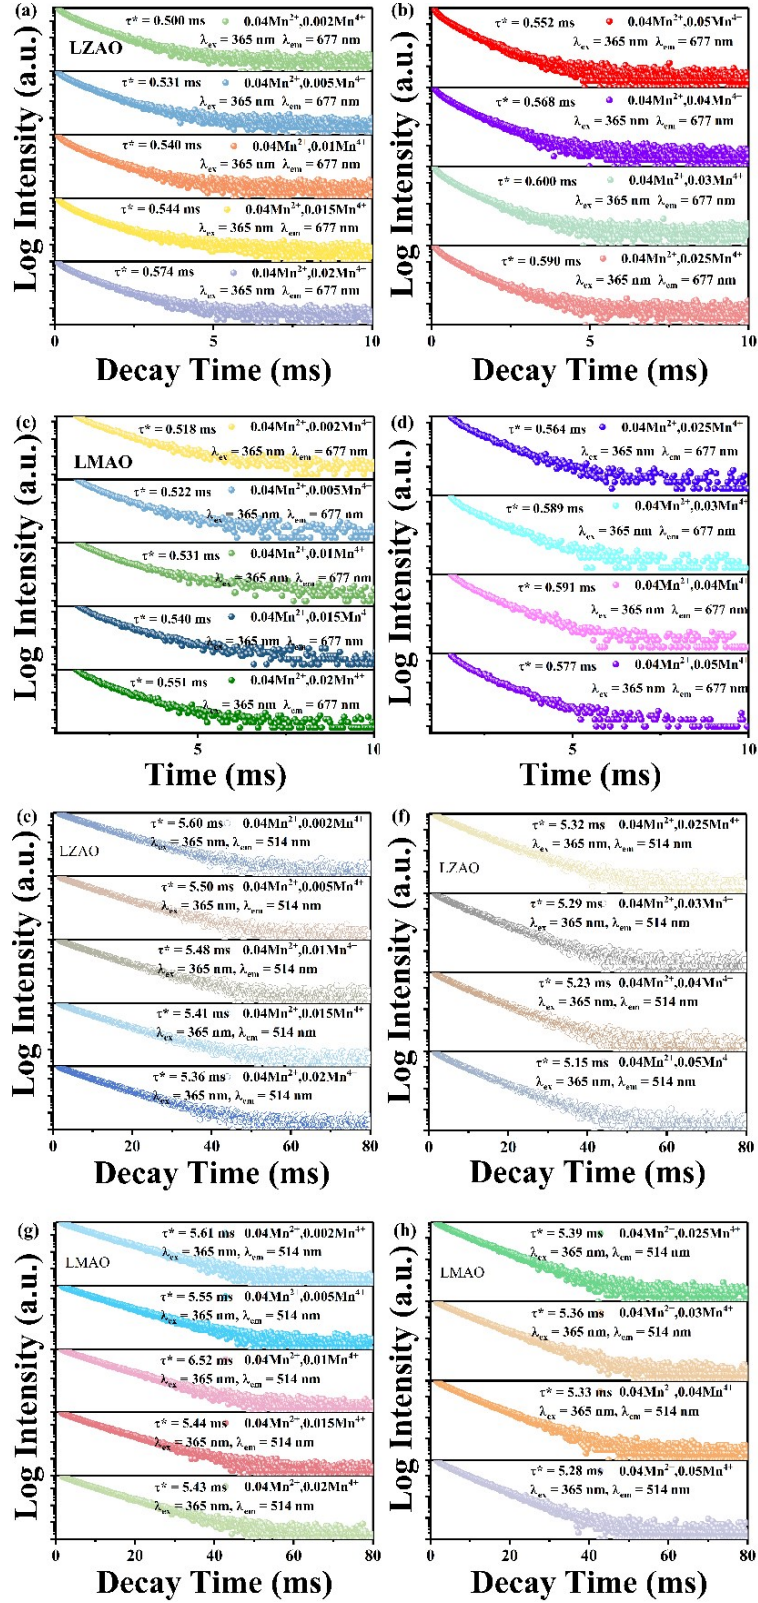

**Figure S8.** Decay curves of  $Mn^{4+}$  in (a-b)  $LaZnAl_{11}O_{19}:0.04Mn^{2+},yMn^{4+}$  and (c-d)  $LaMgAl_{11}O_{19}:0.04Mn^{2+},yMn^{4+}$  ( $\lambda_{ex} = 365$  nm,  $\lambda_{em} = 677$  nm). Decay curves of  $Mn^{2+}$  in (e-f)  $LaZnAl_{11}O_{19}:0.04Mn^{2+},yMn^{4+}$  and (g-h)  $LaMgAl_{11}O_{19}:0.04Mn^{2+},yMn^{4+}$  ( $\lambda_{ex} = 365$  nm,  $\lambda_{em} = 514$  nm).

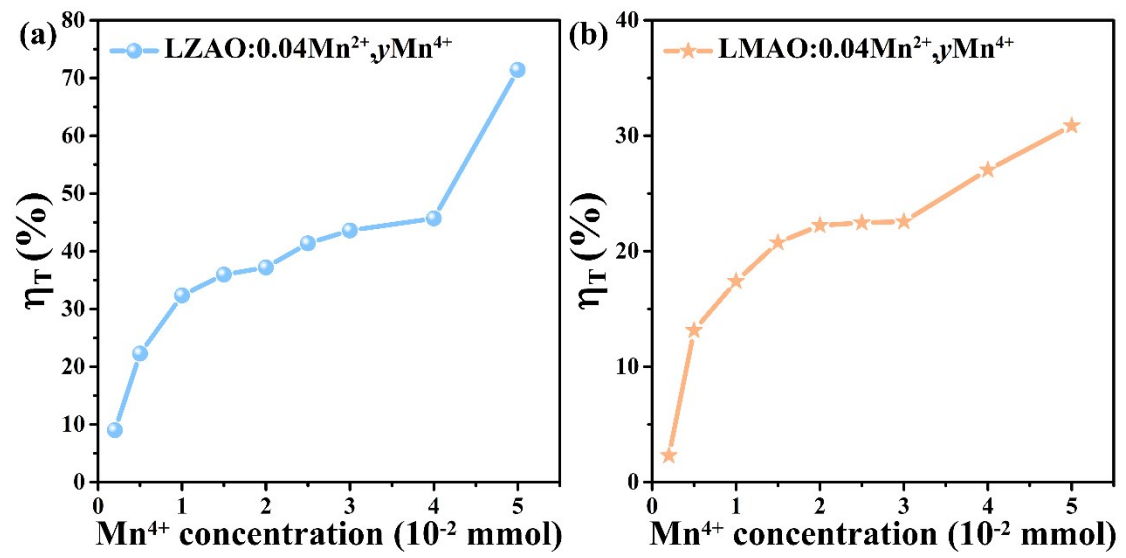

**Figure S9.** (a-b) Dependence of energy transfer efficiencies ( $\eta_T$ ) on  $Mn^{4+}$  concentration in  $LaM_{1-x}Al_{11-y}O_{19}:0.04Mn^{2+},yMn^{4+}$  ( $M = Mg, Zn$ ) phosphors.

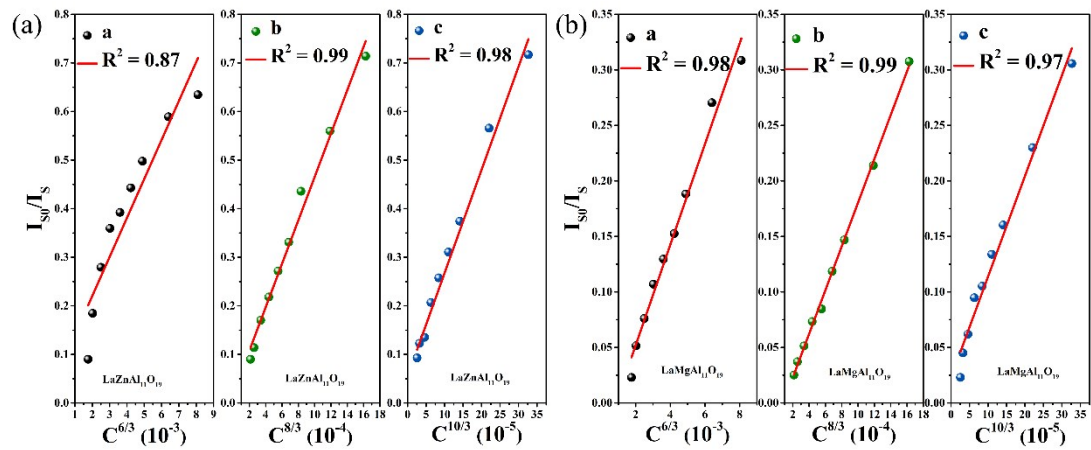

**Figure S10.** (a-b) Dependence of  $I_{S0}/I_S$  of  $\text{Mn}^{2+}$  on  $C^{6/3}$ ,  $C^{8/3}$  and  $C^{10/3}$  in  $\text{LaM}_{1-x}\text{Al}_{11-y}\text{O}_{19}:0.04\text{Mn}^{2+}, y\text{Mn}^{4+}$  ( $M = \text{Mg}, \text{Zn}$ ).

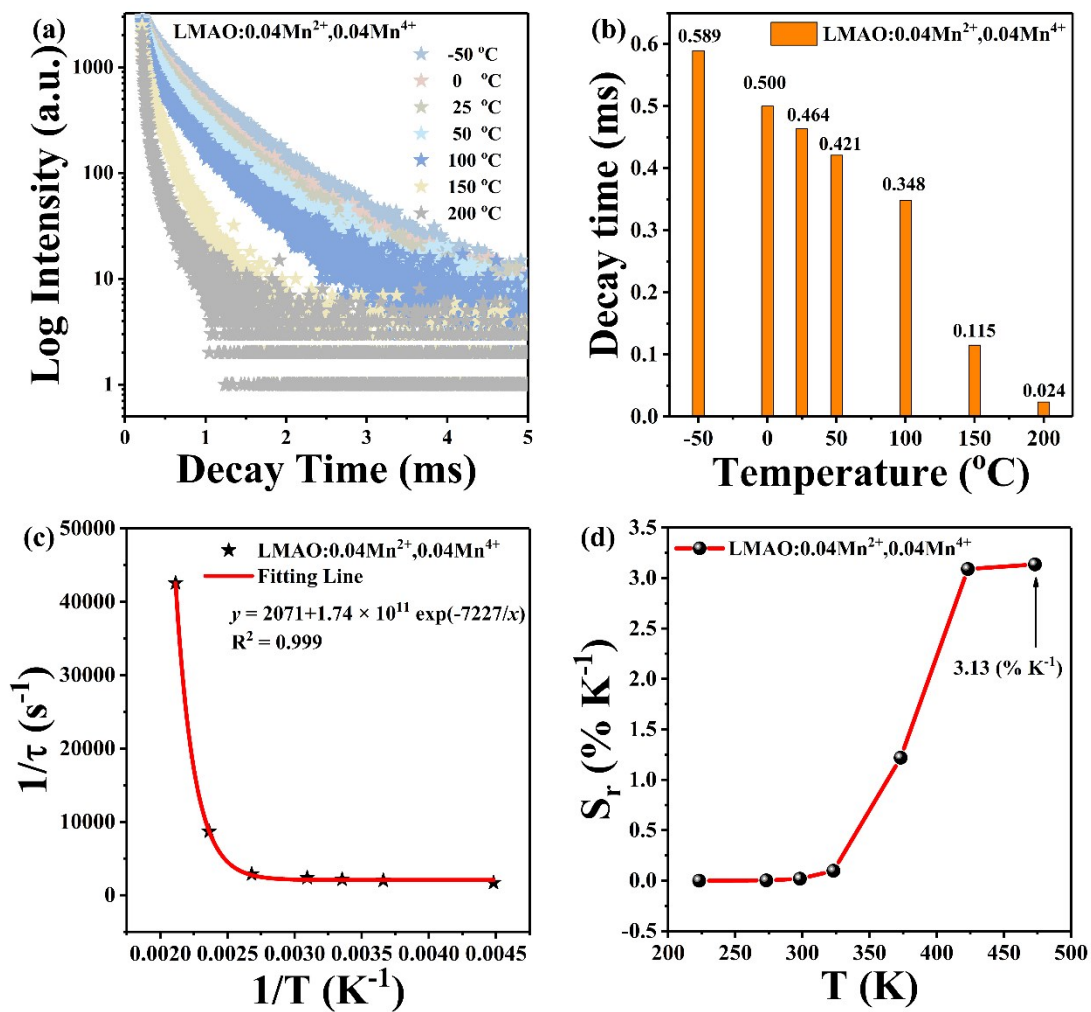

**Figure S11.** (a) Decay curves of LaMgAl<sub>11</sub>O<sub>19</sub>:0.04Mn<sup>2+</sup>,0.04Mn<sup>4+</sup> in -50~200 °C. (b) Changing tendency of the fitted decay lifetimes with temperature. (c) Correlation between  $1/\tau$  vs  $1/T$  and the exponential fitting line. (d) Calculated  $S_r$  LaMgAl<sub>11</sub>O<sub>19</sub>:0.04Mn<sup>2+</sup>,0.04Mn<sup>4+</sup> temperature probe derived from lifetime readout in -50~200 °C.

**Table S1.** Refined crystallographic data and reliability factor for  $\text{LaMAl}_{11}\text{O}_{19}:0.04\text{Mn}^{2+},0.03\text{Mn}^{4+}/0.04\text{Mn}^{4+}$  (M = Mg, Zn).

| formula                              | symmetry  | Space group | a=b/Å | c/Å   | V/Å   | Z | R <sub>wp</sub> (%) | R <sub>p</sub> (%) |
|--------------------------------------|-----------|-------------|-------|-------|-------|---|---------------------|--------------------|
| LaZnAl <sub>11</sub> O <sub>19</sub> | Hexagonal | P63/mmc     | 5.59  | 21.96 | 594.3 | 2 | 7.4                 | 8.6                |
| LaMgAl <sub>11</sub> O <sub>19</sub> | Hexagonal | P63/mmc     | 5.57  | 21.93 | 589.2 | 2 | 6.9                 | 7.5                |

**Table S2.** The CIE coordinates of the  $\text{LaMA}_{11}\text{O}_{19}:0.04\text{Mn}^{2+},0.03\text{Mn}^{4+}/0.04\text{Mn}^{4+}$  (M = Mg, Zn) at different temperatures.

| Temperature (°C) | $\text{LaZnAl}_{11}\text{O}_{19}:0.04\text{Mn}^{2+},0.03\text{Mn}^{4+}$ |      | $\text{LaMgAl}_{11}\text{O}_{19}:0.04\text{Mn}^{2+},0.04\text{Mn}^{4+}$ |      |
|------------------|-------------------------------------------------------------------------|------|-------------------------------------------------------------------------|------|
|                  | x                                                                       | y    | x                                                                       | y    |
| -175             | 0.46                                                                    | 0.45 | 0.43                                                                    | 0.45 |
| -100             | 0.40                                                                    | 0.50 | 0.40                                                                    | 0.47 |
| -50              | 0.37                                                                    | 0.51 | 0.38                                                                    | 0.50 |
| 0                | 0.34                                                                    | 0.55 | 0.37                                                                    | 0.52 |
| 50               | 0.30                                                                    | 0.58 | 0.35                                                                    | 0.55 |
| 100              | 0.28                                                                    | 0.60 | 0.32                                                                    | 0.57 |
| 150              | 0.25                                                                    | 0.62 | 0.29                                                                    | 0.60 |
| 200              | 0.21                                                                    | 0.64 | 0.25                                                                    | 0.65 |
| 250              | 0.16                                                                    | 0.67 | 0.19                                                                    | 0.70 |
